# Supplementary material
Source: PubMed Central journal article supplement (PMC3190742)

# Supplemental Figure S1

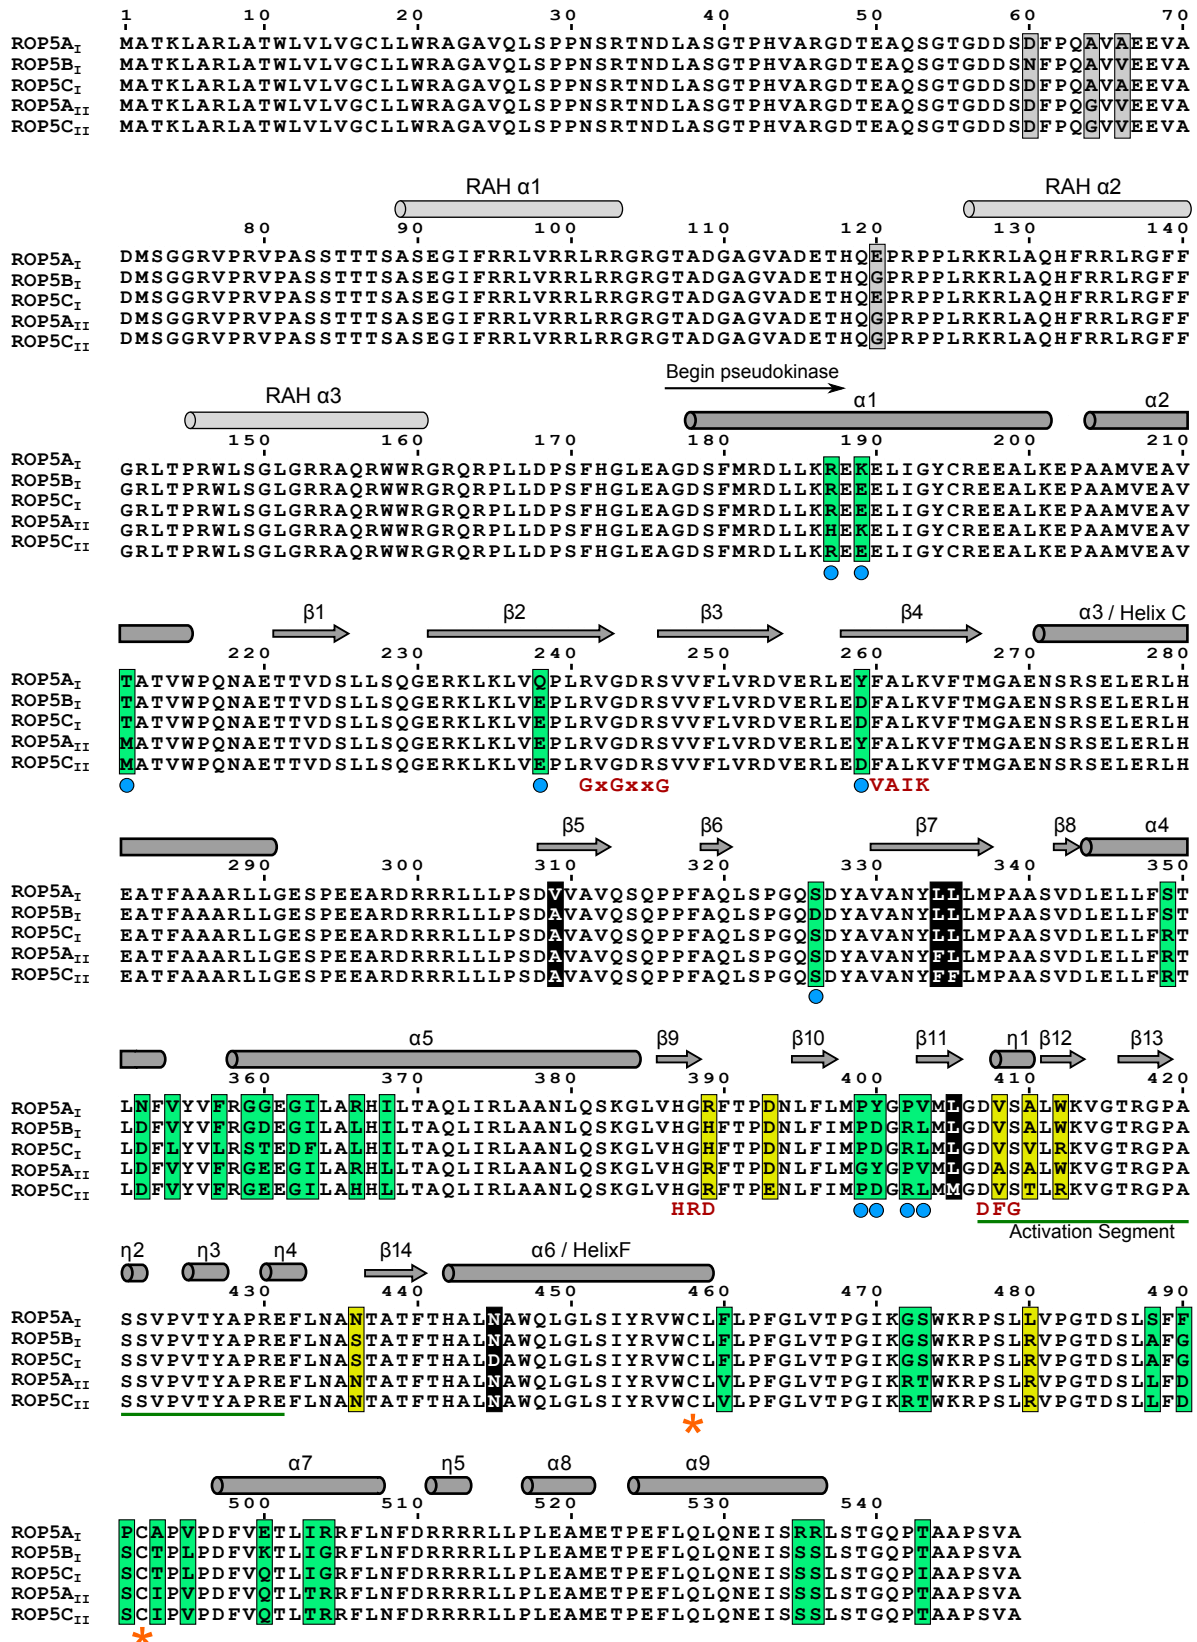

Supplement: supp_M111.253435_jbc.M111.253435-1.pdf [file supp_M111.253435_jbc.M111.253435-1.pdf]

Supplemental Figure S4

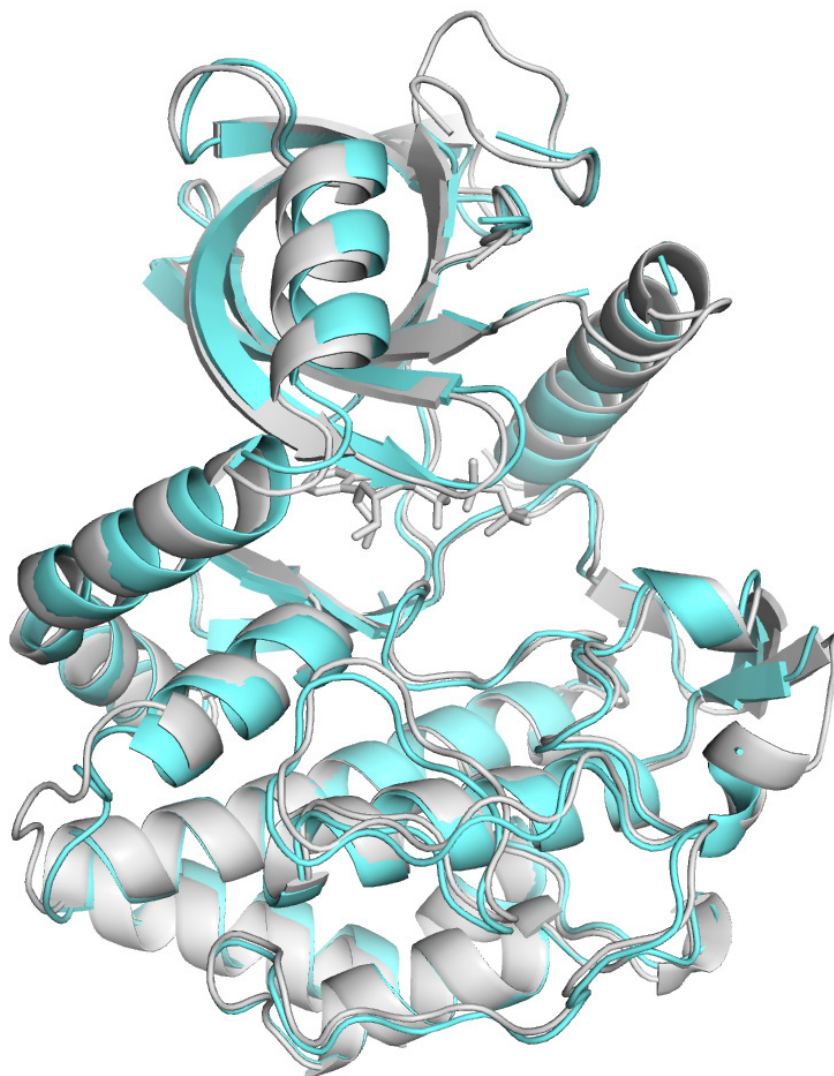

Supplement: supp_M111.253435_jbc.M111.253435-4.pdf [file supp_M111.253435_jbc.M111.253435-4.pdf]

Supplemental Figure S8

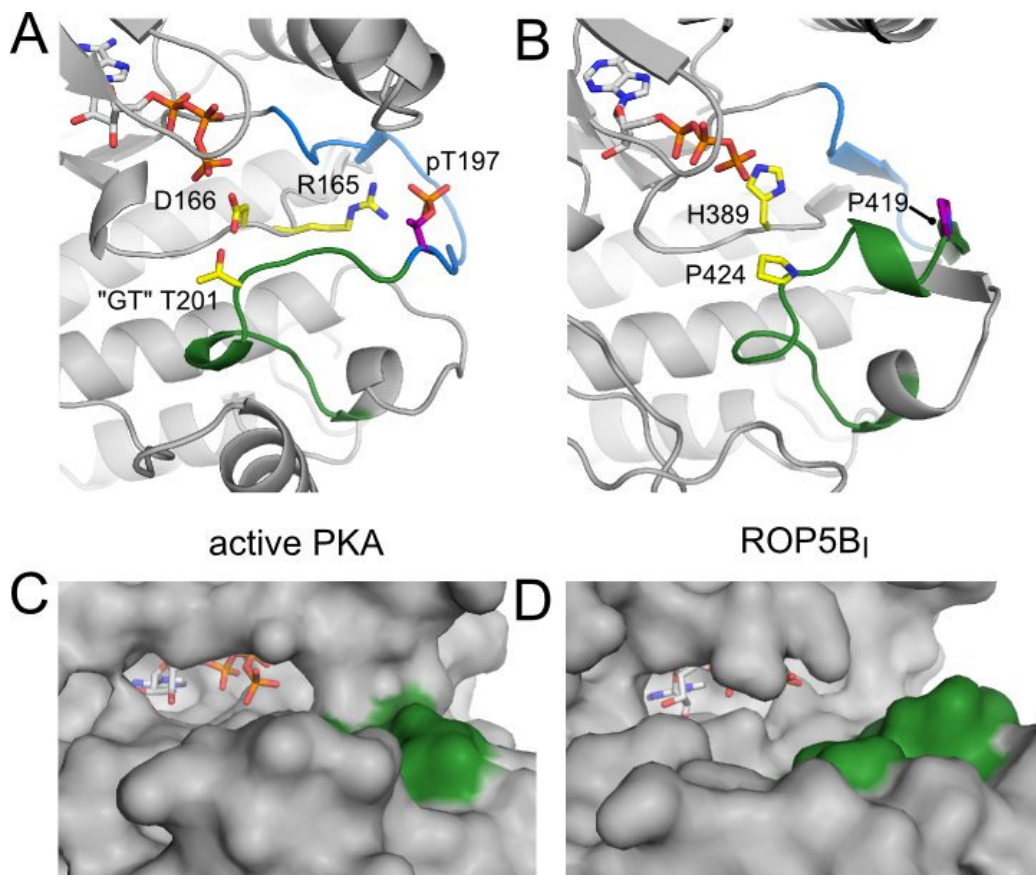

Supplement: supp_M111.253435_jbc.M111.253435-8.pdf [file supp_M111.253435_jbc.M111.253435-8.pdf]
